# Supplementary material for: Multi-gene analysis of the Russula crown clade (Russulales, Basidiomycota) revealed six new species and Alboflavinae subsect. nov. from Fagaceae forests in China
Source: Front Plant Sci. 2024 Oct 7;15:1454035. doi: 10.3389/fpls.2024.1454035 (PMC11494609; doi:10.3389/fpls.2024.1454035)
Supplement: Supplementary Table 1 — Sampling site information of the newly collected specimens in this study. [file Table1.xlsx]

## Sheet: Sheet1
Sampling site	Mountain range	Coordinate	Altitude	Location
Baicaowa National Forest Park	Yanshan Mountains	N40°50′12″, E117°35′31″	900–1300 m	Luanping County, Chengde City, Hebei Province, North China
Bingshanliang Scenic Zone	Yanshan Mountains	N41°17′34″, E115°47′30″	900–1500 m	Chicheng County, Zhangjiakou City, Hebei Province, North China
Hongguang Village, Jingpeng Township	Great Khingan Mountains	N43°9′18″, E117°30′8″	1000–1500 m	Hexigten Qi, Chifeng City, Inner Mongolia Autonoumous Region, North China
Labudalin Subdistrict	Great Khingan Mountains	N50°21′47″, E120°25′57″	200–400 m	Ergun county-level City, Hulun Buir City, Inner Mongolia Autonoumous Region, Northeast China
Liaoheyuan National Forest Park	Yanshan Mountains	N41°19′50″, E118°27′54″	700–1500 m	Pingquan county-level City, Chengde City, Hebei Province, North China
Ma’anshan National Forest Park	Yanshan Mountains	N41°52′29″, E118°48′16″	800–1300 m	Pingquan county-level City, Chengde City, Hebei Province, North China
Heilihe National Nature Reserve, Dabagou	Yanshan Mountains	N41°52′29″, E118°23′41″	900–1600 m	Ningcheng City, Chifeng City, Inner Mongolia Autonoumous Region, North China
Heilihe National Nature Reserve, Sandaohe	Yanshan Mountains	N41°29′25″, E118°24′50″	900–1600 m	Ningcheng City, Chifeng City, Inner Mongolia Autonoumous Region, North China
Heilihe National Nature Reserve, Sidaogou	Yanshan Mountains	N41°30′49″, E118°24′14″	900–1600 m	Ningcheng City, Chifeng City, Inner Mongolia Autonoumous Region, North China
Taipingzhuang Village, Meilin Township	Yanshan Mountains	N41°42′17″, E118°11′43″	1100–1600 m	Harqin Qi, Chifeng City, Inner Mongolia Autonoumous Region, North China
Tuoliang National Nature Reserve	Taihang Mountains	N38°44′8″, E113°49′29″	700–1500 m	Pingshan County, Shijiazhuang City, Hebei Province, North China
Saihanwula National Nature Reserve, Wangfengou	Great Khingan Mountains	N44°16′39″, E118°24′56″	1200–1600 m	Bairin Youqi, Chifeng City, Inner Mongolia Autonoumous Region, North China
Wuyuezhai National Forest Park	Taihang Mountains	N38°43′34″, E113°52′1″	1300–1700 m	Lingshou County, Shijiazhuang City, Hebei Province, North China
Saihanwula National Nature Reserve, Zhenggou	Great Khingan Mountains	N44°13′5″, E118°13′14″	1200–1600 m	Bairin Youqi, Chifeng City, Inner Mongolia Autonoumous Region, North China
Zhushitou Forest Farm	Wuling Mountains	N 29°19′36″, E 110°12'34″	700–1100 m	Yongding District, Zhangjiajie City, Hunan Province, Central China
Zhangjiajie Campus of Jishou University	Wuling Mountains	N 29°9′36″, E 110°27′33″	200–300 m	Yongding District, Zhangjiajie City, Hunan Province, Central China
